# Supplementary material for: Kinetics and mechanism of the reaction of cyanocobalamin with potassium hydroxide in non-aqueous media
Source: Royal Society of Chemistry journal article supplement (doi:10.1039/c9nj01361j), 2019-01-01
Supplement: c9nj01361j1.pdf [file c9nj01361j1.pdf]

**Electronic Supplementary Information for:**  
**Kinetics and mechanism of the reaction of cyanocobalamin with potassium hydroxide in non-aqueous media**

**Denis S. Salnikov<sup>\*</sup>, Sergei V. Makarov**

*Department of Food Chemistry, State University of Chemistry and Technology,  
Sheremetevskiy str. 7, Ivanovo, 153000, Russia*  
**densal@isuct.ru**

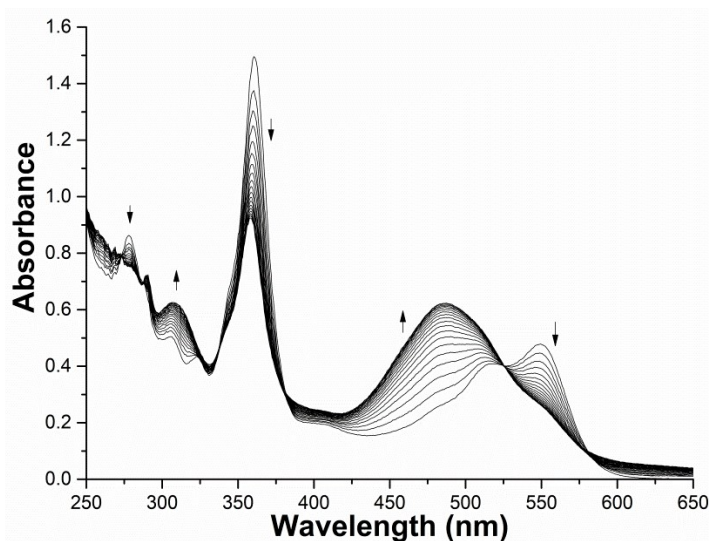

**Figure S1.** UV-Vis spectral changes recorded during reaction between CNCbl and KOH in *i*PrOH (*first step*): [CNCbl] =  $6 \times 10^{-5}$  M; [KOH] = 1 mM; 15 °C; anaerobic conditions.

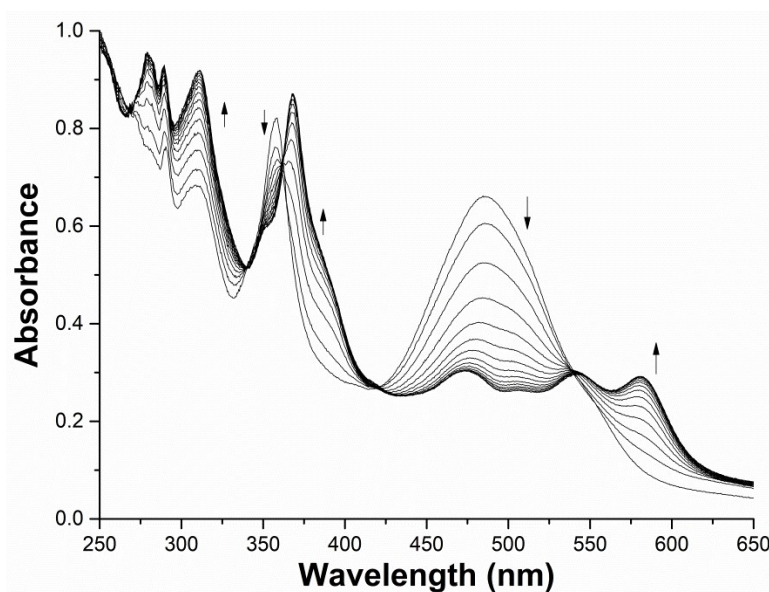

**Figure S2.** UV-Vis spectral changes recorded during reaction between CNCbl and KOH in *i*PrOH (*second step*): [CNCbl] =  $6 \times 10^{-5}$  M; [KOH] = 1 mM; 15 °C; anaerobic conditions.

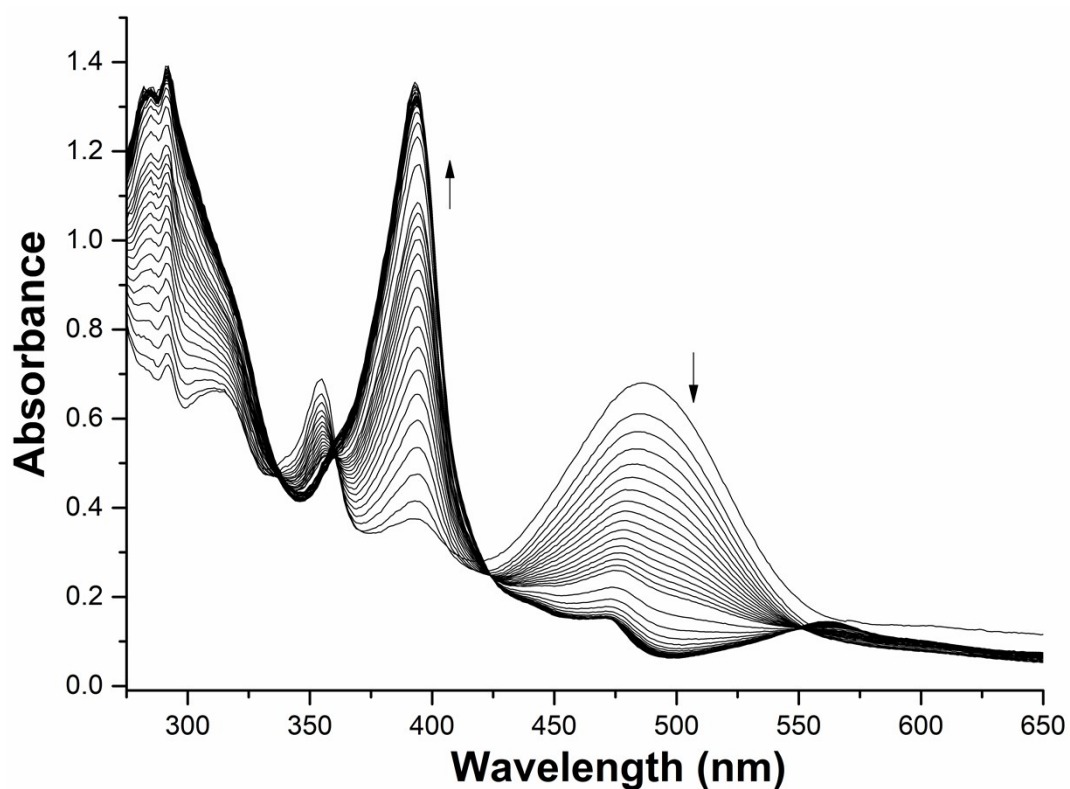

**Figure S3.** UV-Vis spectral changes recorded during reaction between CNCbl and KOH in DMSO (*second step*): [CNCbl] =  $6 \times 10^{-5}$  M; [KOH] = 1 mM; 15 °C; anaerobic conditions.

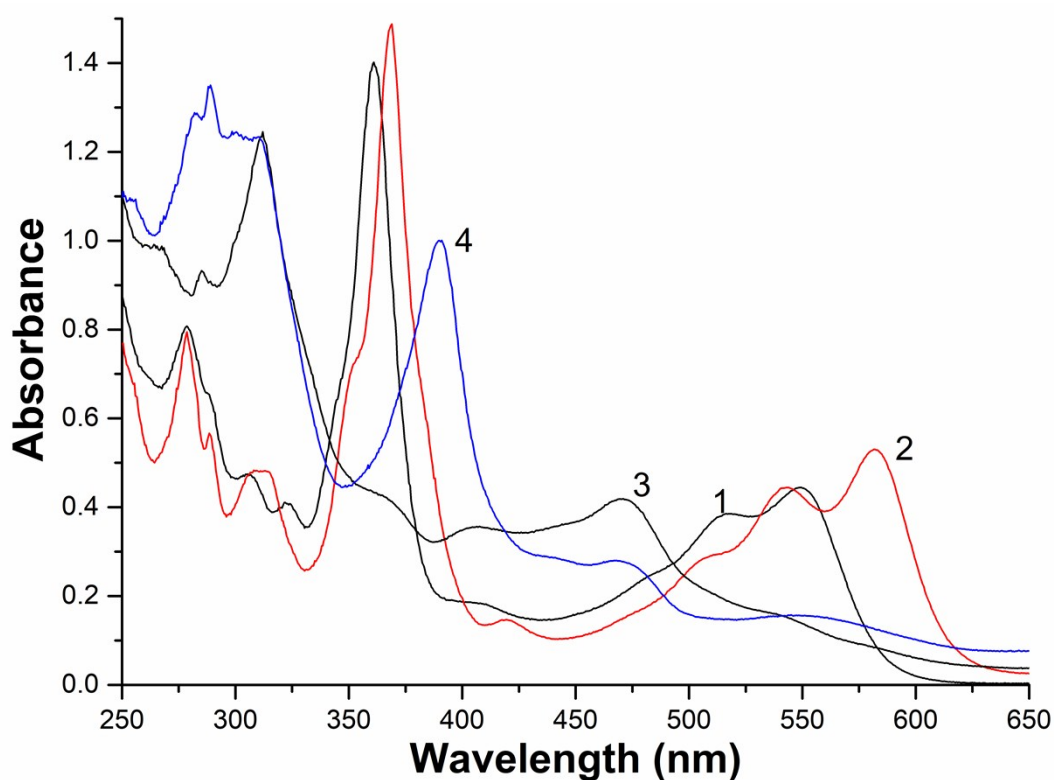

**Figure S4.** UV-vis spectra of different cobalamins in *i*PrOH: 1 - cyanocobalamin, 2 – dicyanocobalamin, 3 – reduced cobalamin  $\text{Co}^{2+}$ , 4 – super reduced cobalamin  $\text{Co}^{1+}$ : [Cbl] =  $6.0 \times 10^{-5}$  M, 25 °C.

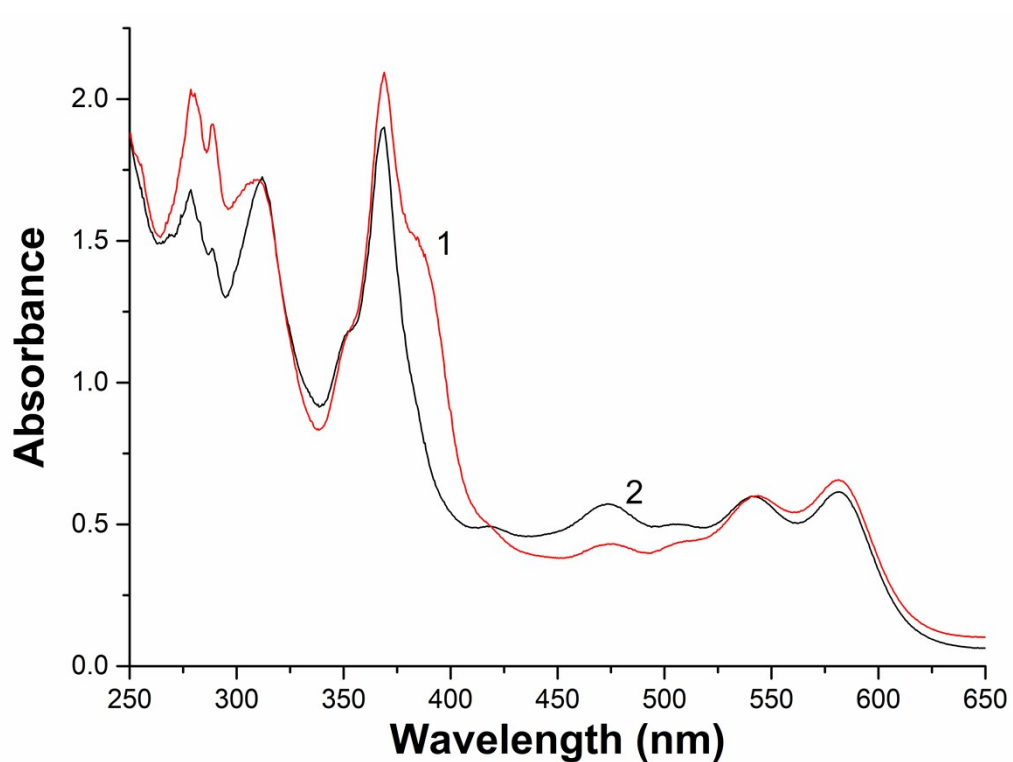

**Figure S5.** UV-vis spectra of mixtures: 1 – dicyanocobalamin and super reduced cobalamin  $\text{Co}^{1+}$  1:1 ratio, 2 - dicyanocobalamin and reduced cobalamin  $\text{Co}^{2+}$  1:1 ratio:  $[\text{Cbl}] = 6.0 \times 10^{-5} \text{ M}$

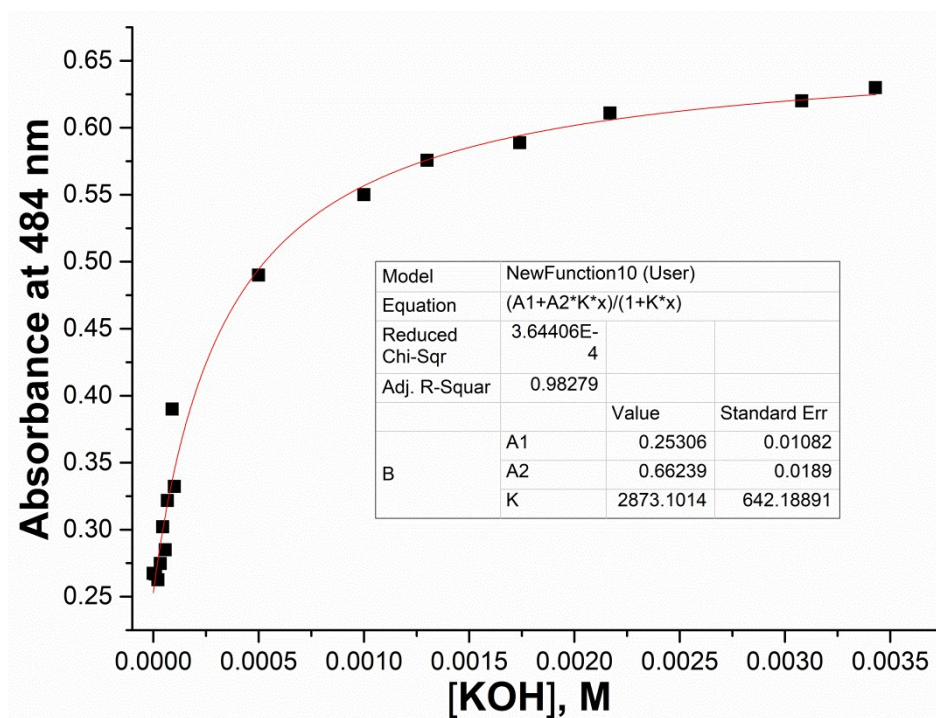

**Figure S6.** Dependence of the absorbance of the intermediate formed during the reaction of cyanocobalamin with potassium hydroxide at 484 nm versus  $[\text{KOH}]$  in  $i\text{PrOH}$ :  $[\text{CNCbl}] = 6.0 \times 10^{-5} \text{ M}$ ,  $25^\circ\text{C}$ , anaerobic conditions.

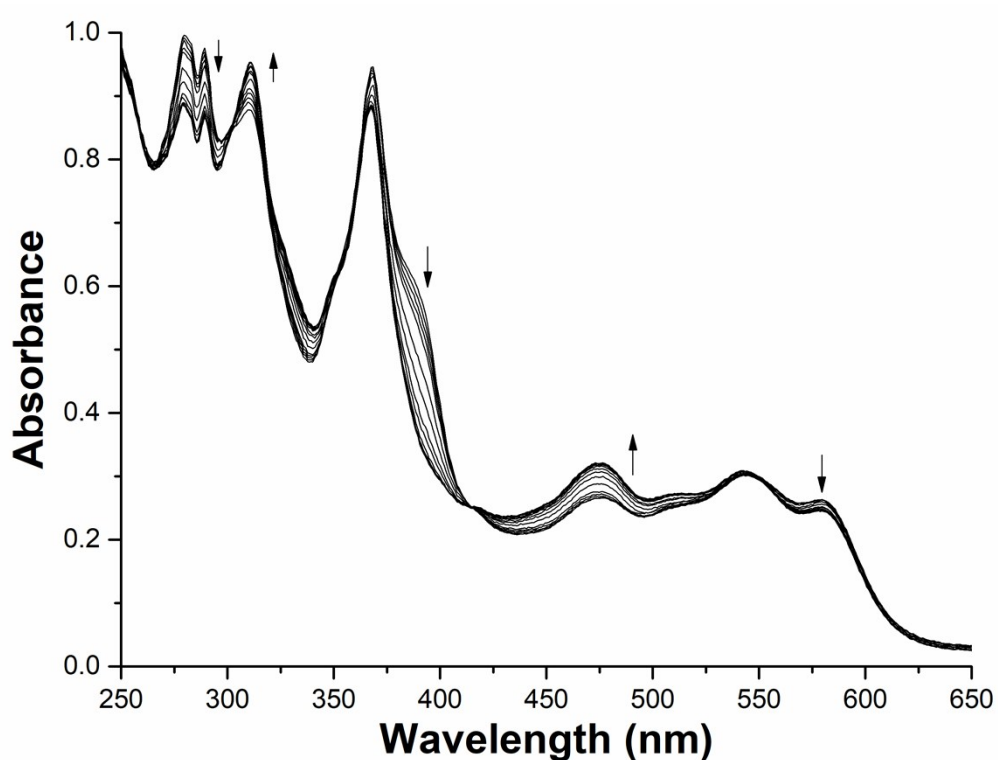

**Figure S7.** UV-vis spectral changes registered during storage solution of the product of reaction between cyanocobalamin and potassium hydroxide in *i*PrOH: [CNCbl] =  $6 \times 10^{-5}$  M; [KOH] = 1 mM; 15 °C; anaerobic conditions.

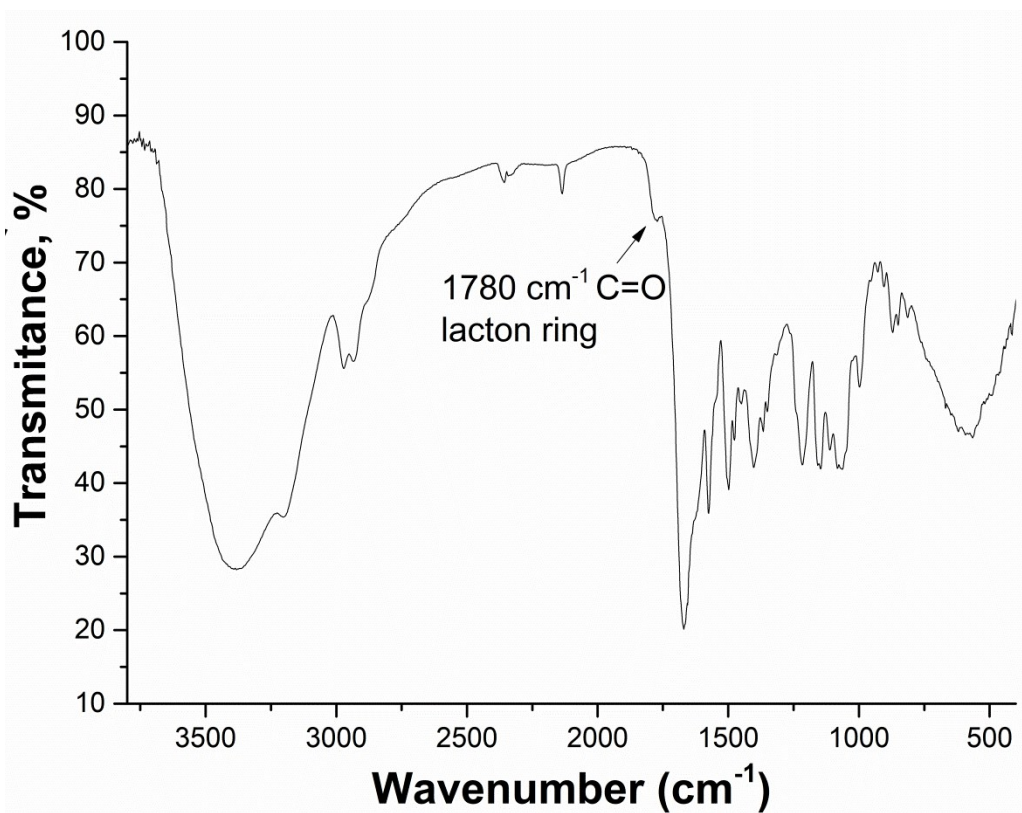

**Figure S8.** IR-spectrum of red product 1 (dehydrovitamin B<sub>12</sub>, containing lactone ring at C8) in KBr.

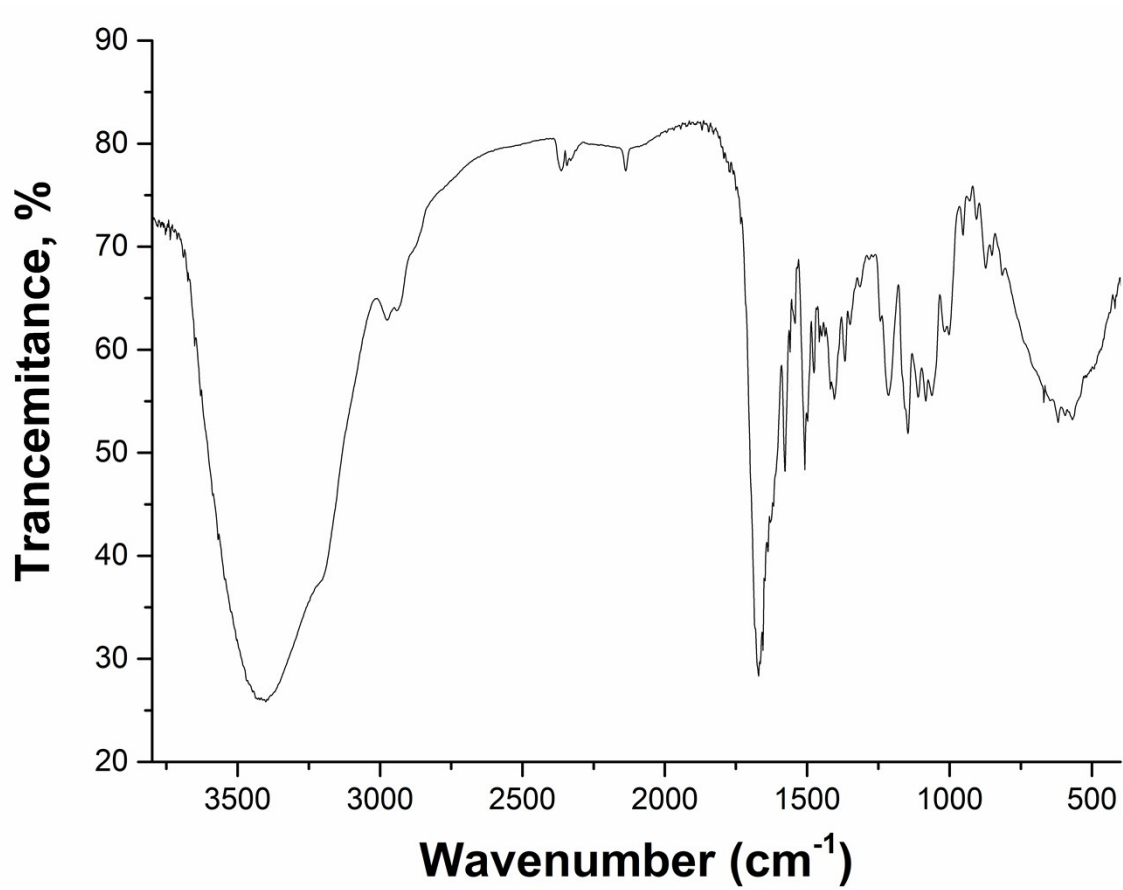

**Figure S9.** IR-spectrum of red product 2 (dehydrovitamin B<sub>12</sub>, containing unsaturated amide side chain) in KBr.

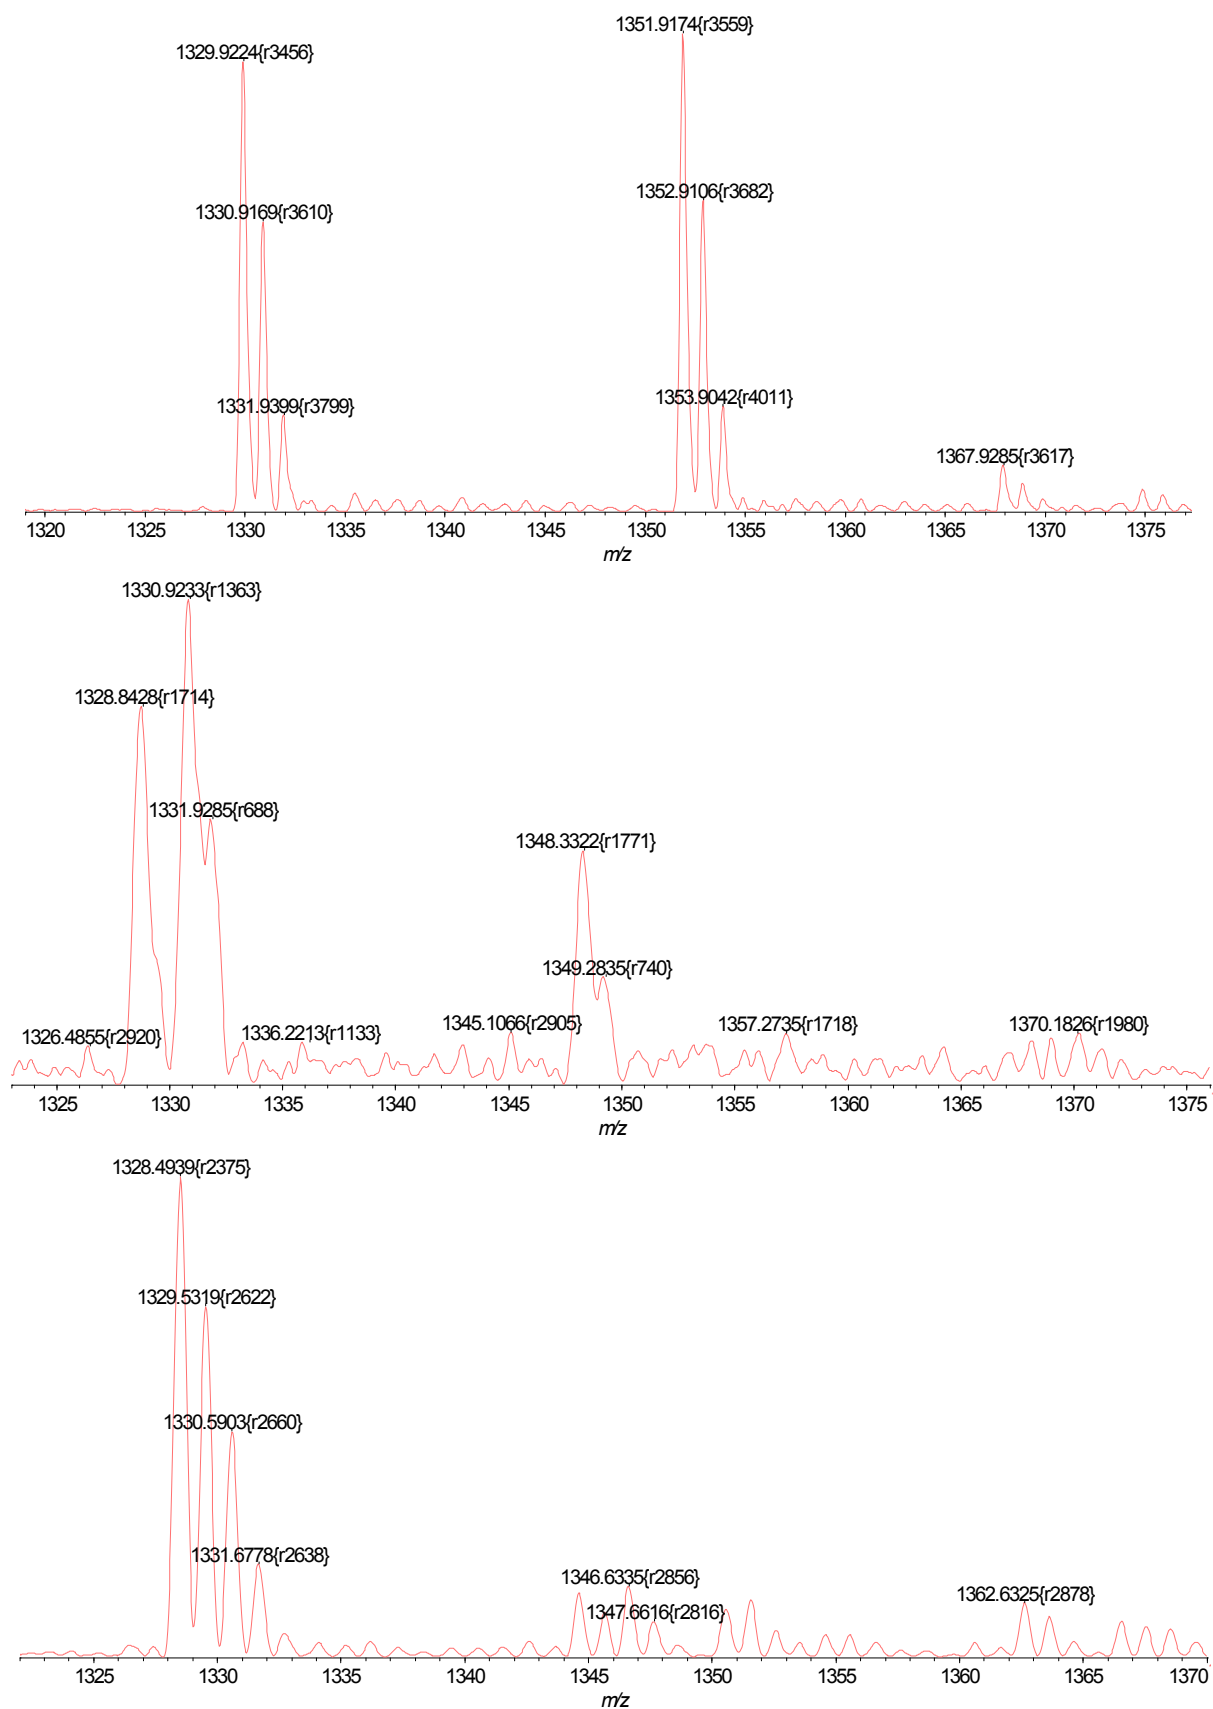

**Figure S10.** MALDI TOF mass spectra: top – cyanocobalamin, middle - red product 1, bottom – red product 2



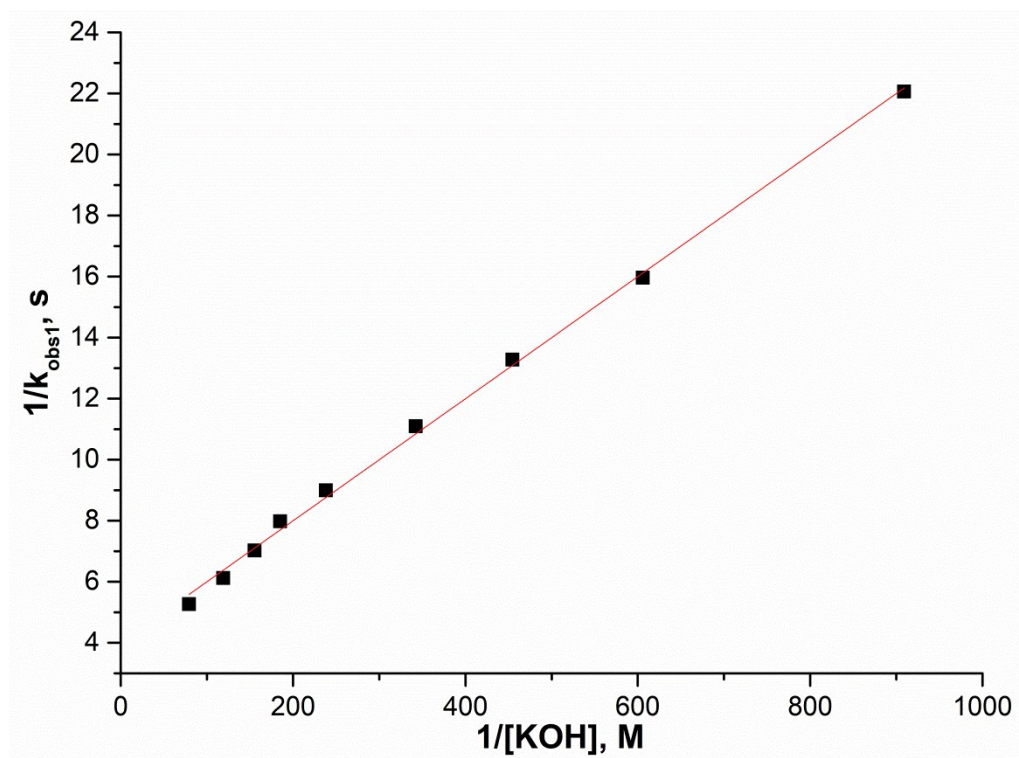

**Figure S11.** Plot  $1/k_{\text{obs1}}$  vs  $1/[\text{KOH}]$  for the reaction of cyanocobalamin with potassium hydroxide in  $i\text{PrOH}$  (first step):  $[\text{CNCbl}] = 6 \times 10^{-5} \text{ M}$ ;  $15^\circ\text{C}$ .

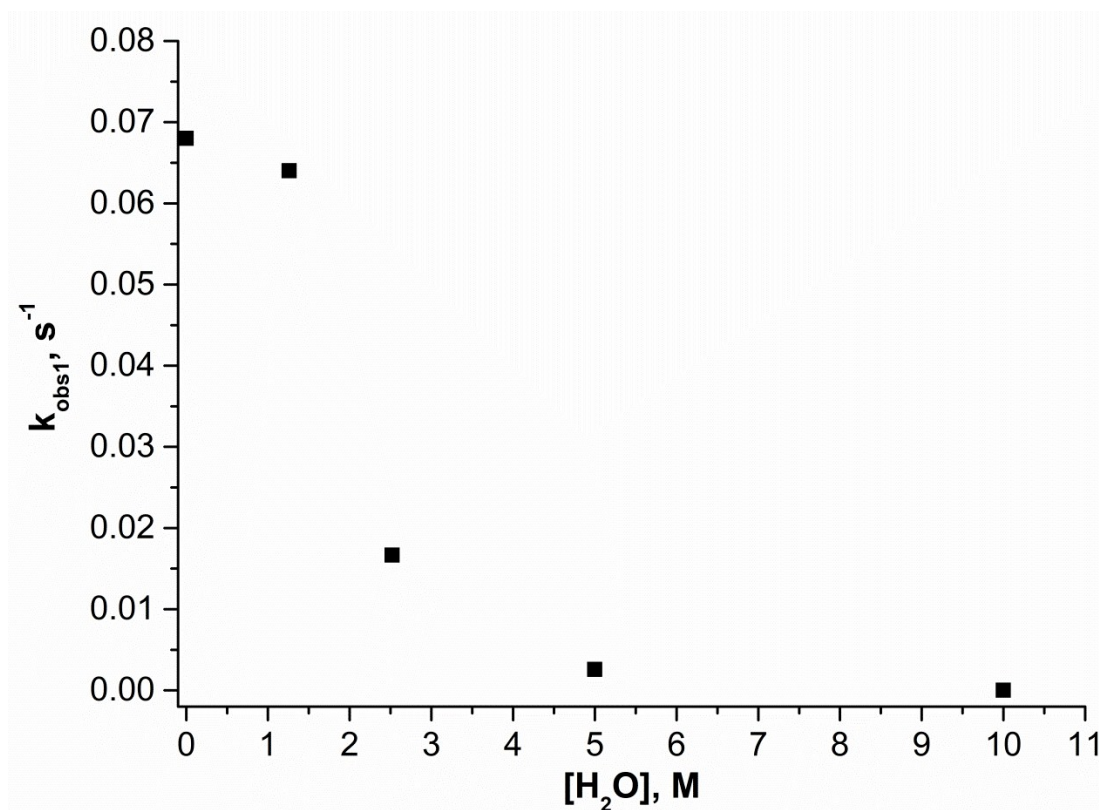

**Figure S12.** The dependence of  $k_{\text{obs1}}$  vs water concentration in  $i\text{PrOH}$ :  $[\text{CNCbl}] = 6 \times 10^{-5} \text{ M}$ ;  $[\text{KOH}] = 1.4 \text{ mM}$ ; anaerobic conditions.

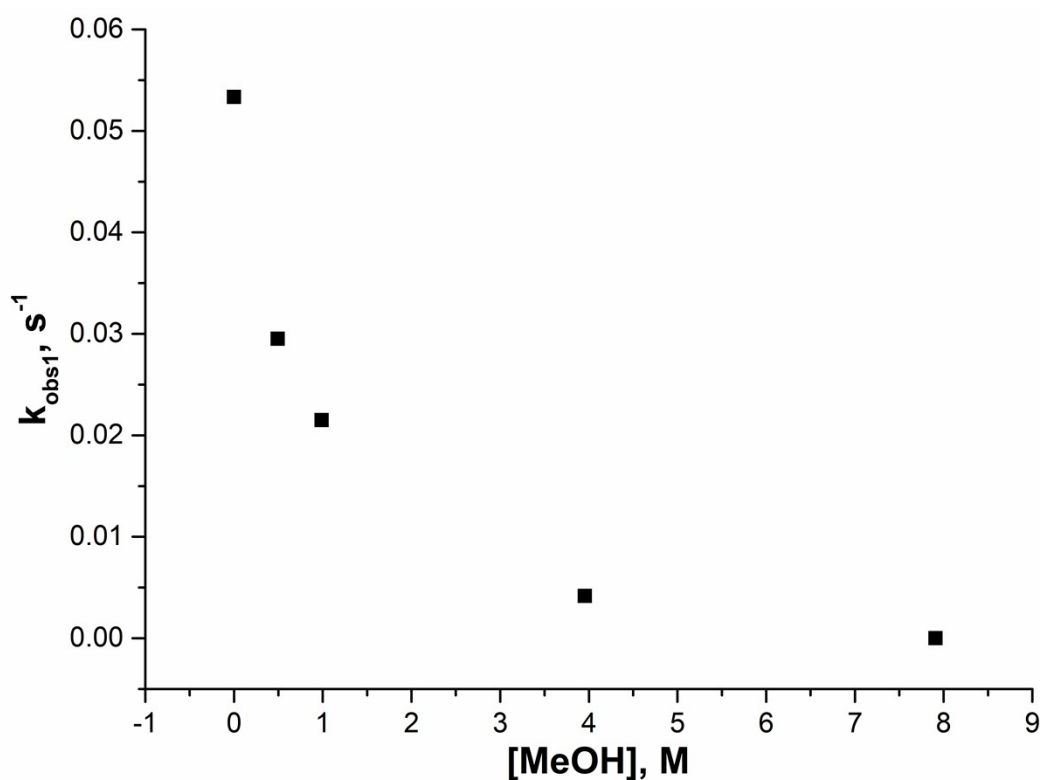

**Figure S13.** The dependence of  $k_{obs1}$  vs methanol concentration in  $^iPrOH$ :  $[CNCbl] = 6 \times 10^{-5}$  M;  $[KOH] = 1.4$  mM; anaerobic conditions.

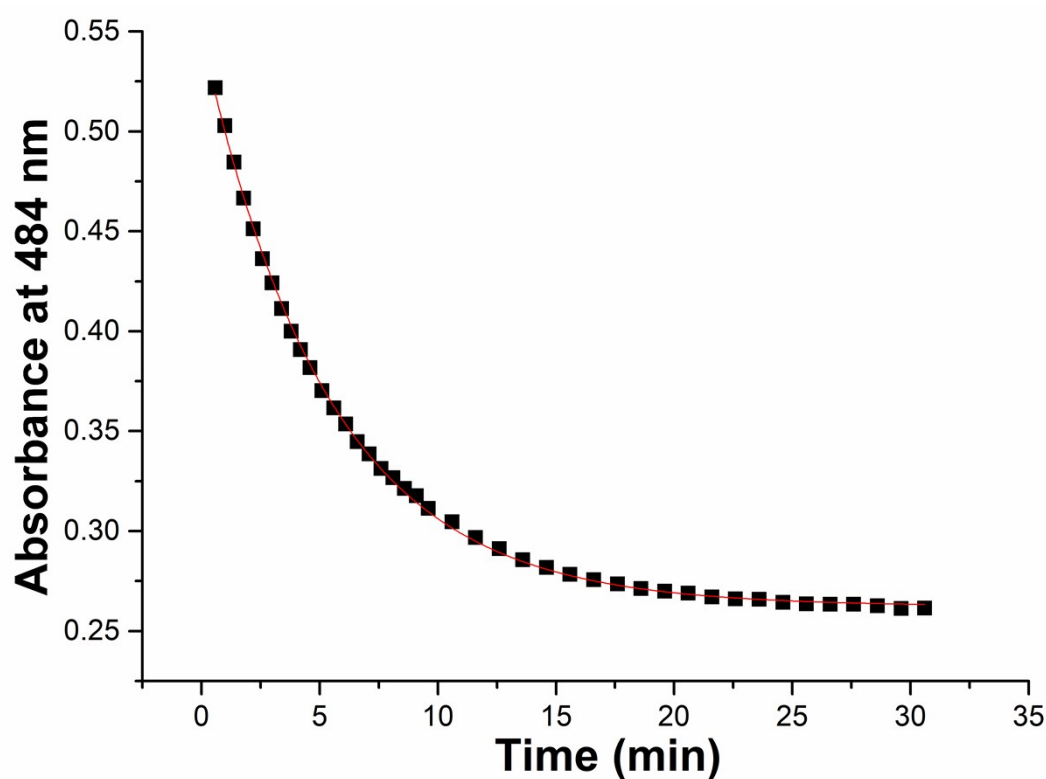

**Figure S14.** Typical kinetic trace recorded for decomposition of intermediate generated by mixing cyanocobalamin with potassium hydroxide at  $[CNCbl]:[KOH] = 1:1$  ratio in DMSO:  $[CNCbl] = [KOH] = 6.0 \times 10^{-5}$  M,  $20^\circ C$ , anaerobic conditions



**Table S1.** Kinetic and thermodynamic parameters for decomposition of intermediate generated by mixing cyanocobalamin and potassium hydroxide in iPrOH or DMSO

| T, °C                                        | $k_{11} \cdot 10^3, \text{s}^{-1}$ |
|----------------------------------------------|------------------------------------|
| 35                                           | $12.9 \pm 0.2$                     |
| 30                                           | $8.3 \pm 0.3$                      |
| 25                                           | $3.8 \pm 0.2$                      |
| 20                                           | $2.7 \pm 0.05$                     |
| 15                                           | $1.2 \pm 0.1$                      |
| 10                                           | $0.67 \pm 0.02$                    |
| $\Delta H^\ddagger(k), [\text{kJ mol}^{-1}]$ | $+ 84 \pm 12$                      |
| $\Delta S^\ddagger(k), [\text{kJ mol}^{-1}]$ | $- 7 \pm 2$                        |

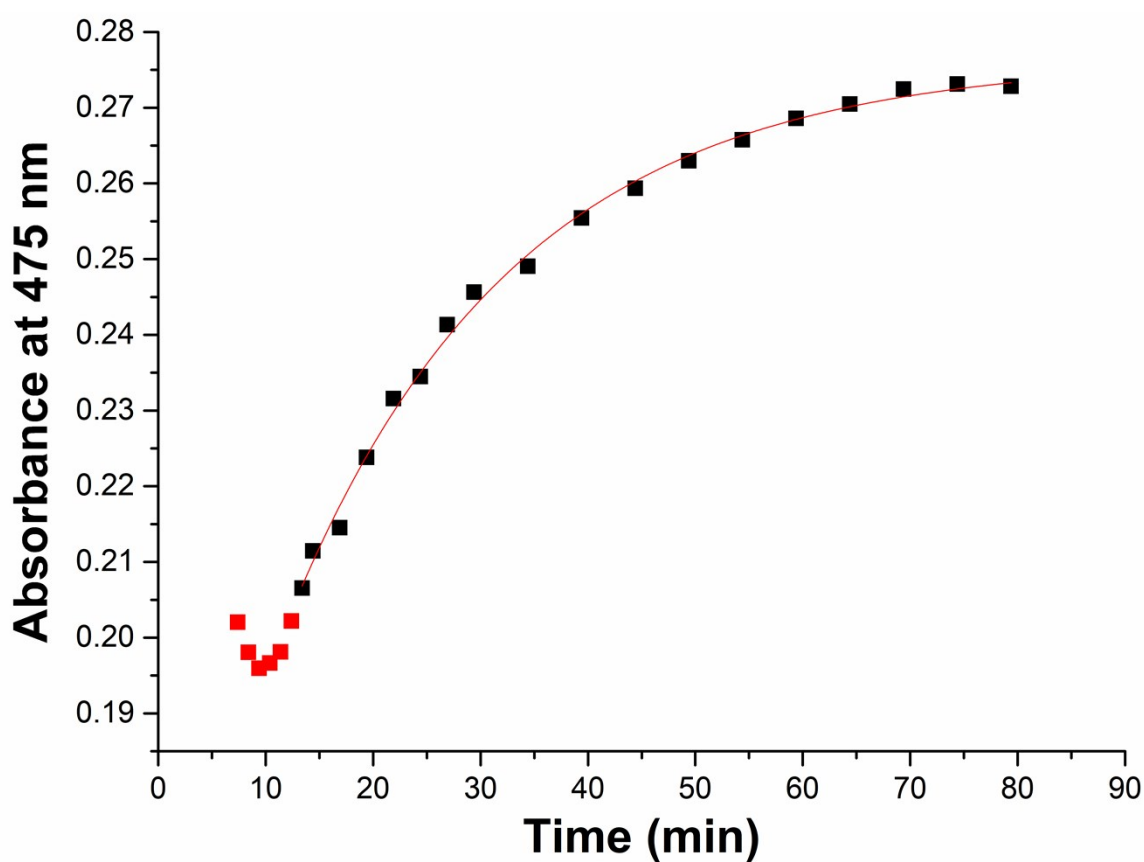

**Figure S15.** Typical kinetic trace recorded for decomposition of super reduced  $\text{Co}^{1+}$  generated by mixing cyanocobalamin and potassium hydroxide in iPrOH:  $[\text{CNCbl}] = 6 \times 10^{-5} \text{ M}$ ;  $[\text{KOH}] = 1 \text{ mM}$ ;  $15 \text{ }^\circ\text{C}$ ; anaerobic conditions.

**Table S2.** Kinetic and thermodynamic parameters for decomposition of super reduced  $\text{Co}^{1+}$  generated by mixing cyanocobalamin and potassium hydroxide in *i*PrOH

|                                                                     |                      |
|---------------------------------------------------------------------|----------------------|
| T, °C                                                               | $k_5, \text{s}^{-1}$ |
| 35                                                                  | 0.008                |
| 30                                                                  | 0.004                |
| 25                                                                  | 0.0026               |
| 20                                                                  | 0.0012               |
| 15                                                                  | 0.00078              |
| $\Delta H^\ddagger(k), [\text{kJ} \text{ МОЛЬ}^{-1}]$               | $+ 78 \pm 4$         |
| $\Delta S^\ddagger(k), [\text{J} \text{ K}^{-1} \text{ МОЛЬ}^{-1}]$ | $- 34 \pm 3$         |

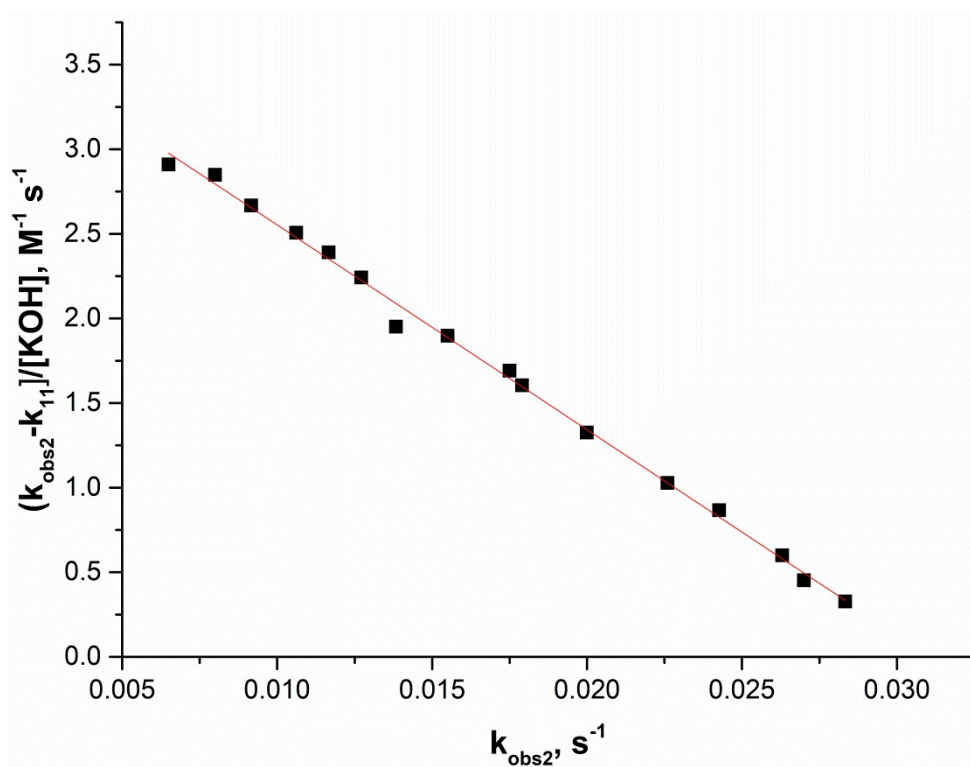

**Figure S16.** Plot  $(k_{\text{obs}2} - k_{11})/[\text{KOH}]$  vs  $k_{\text{obs}2}$  for the reaction of cyanocobalamin with potassium hydroxide in *i*PrOH (*second step*):  $[\text{CNCbl}] = 6 \times 10^{-5} \text{ M}$ ;  $15 \text{ }^\circ\text{C}$ ; anaerobic conditions
